# Supplementary material for: Generalized Pareto Regression Trees for extreme event analysis
Source: Research Square preprint supplement (doi:10.21203/rs.3.rs-1874510/v1), 2022-07-22
Supplement: Supplementary file 1 [file f3329985546884fc6db5fc72.pdf]

# Supplementary material for “Generalized Pareto Regression Trees for extreme events analysis”

Sébastien Farkas<sup>1</sup>, Antoine Heranval<sup>1,2</sup>, Olivier Lopez<sup>1</sup>  
and Maud Thomas<sup>1\*</sup>

<sup>1</sup>Laboratoire de Probabilités, Statistique et Modélisation,  
Sorbonne Université, CNRS, 4 place Jussieu, Paris, F-75005,  
France.

<sup>2</sup>Mission Risques Naturels, 1 rue Jules Lefebvre, Paris, 75009,  
France.

\*Corresponding author(s). E-mail(s):

[maud.thomas@sorbonne-universite.fr](mailto:maud.thomas@sorbonne-universite.fr);

Contributing authors: [sebastien.farkas@sorbonne-universite.fr](mailto:sebastien.farkas@sorbonne-universite.fr);

[antoine.heranval@sorbonne-universite.fr](mailto:antoine.heranval@sorbonne-universite.fr);

[olivier.lopez@sorbonne-universite.fr](mailto:olivier.lopez@sorbonne-universite.fr);

## A. Boxplots of the quadratic errors of the simulation study

In this section, the boxplots of the quadratic errors  $\int_0^1 (\hat{\gamma}(x) - \gamma_0(x))^2 dx$  are shown for both cases (i) step-wise function (Figure 1) and (ii) smooth function (Figure 2).

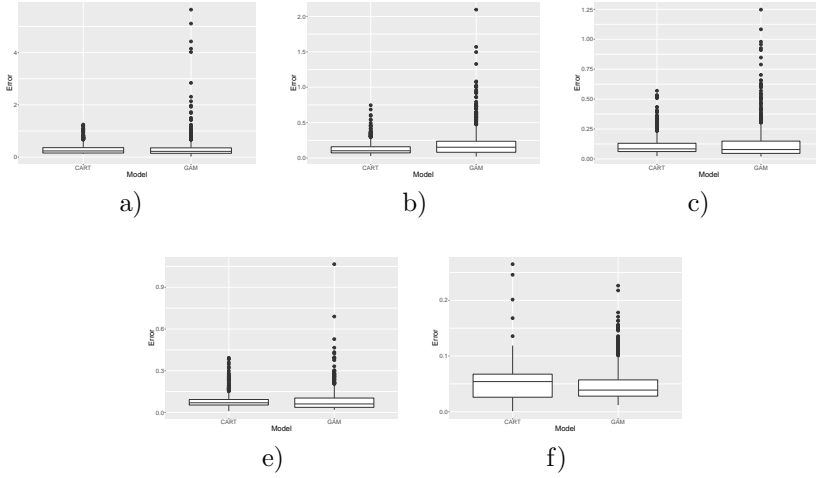

**Fig. 1** Boxplots of the quadratic errors for each model in the step-wise case for a) 100 b) 250 c) 500 d) 1 000 and e) 2 500 excesses.

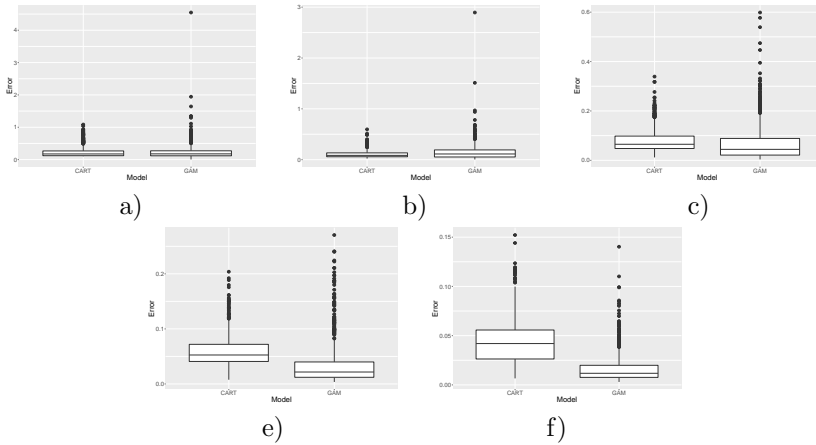

**Fig. 2** Boxplots of the quadratic errors for each model in the smooth case for a) 100 b) 250 c) 500 d) 1 000 and e) 2 500 excesses.

## B. Impact of threshold choice on the GP regression tree in the flooding event study

Figure 3 shows the sensitivity of our method to the choice of threshold for the GP distribution fit.

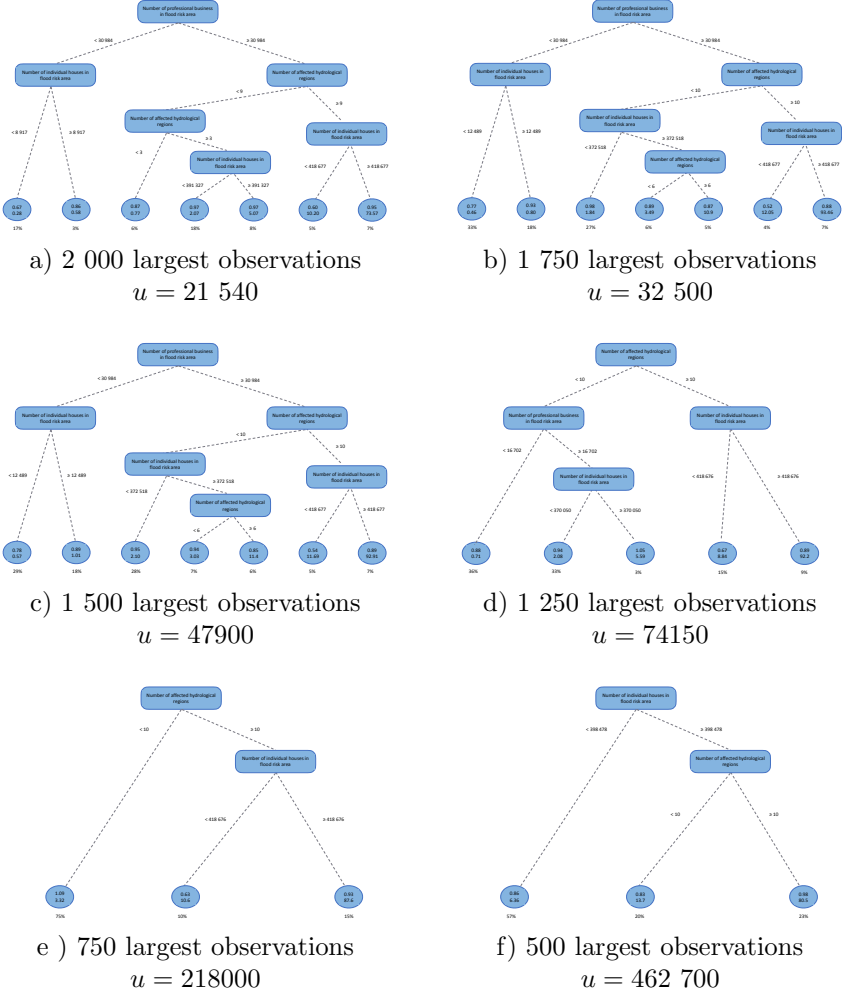

**Fig. 3** Trees obtained by the GP regression procedure fitted on the observations exceeding different thresholds making the number of excesses ranging from 2 000 to 500 by steps of 250. For each leaf, the estimates of  $\gamma$  and  $\sigma_u$  and the proportion of observations are given.

## C. Quantile-quantile plots of the GP regression tree of the flooding events

The quantile-quantile plots for the fit of the GP distribution in each leaf of the tree (Figure 2 of the main document) are shown.

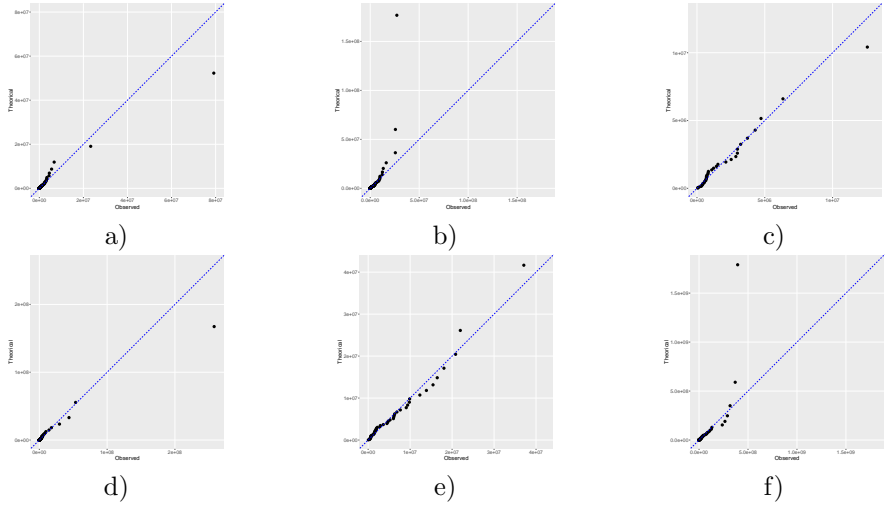

**Fig. 4** Quantile-quantile plots for each leaf of the GP regression tree of the flooding events  
 a) Leaf 1 b) Leaf 2 c) Leaf 3 d) Leaf 4 e) Leaf 5 and f) Leaf 6.
